# Supplementary material for: Novel Mitoviruses and a Unique Tymo-Like Virus in Hypovirulent and Virulent Strains of the Fusarium Head Blight Fungus, Fusarium boothii
Source: MDPI journal article supplement (doi:10.3390/v10110584), 2018-10-26
Supplement: s1 [file s1]

CLUSTAL format alignment by MAFFT (v7.408)

```

FbMV1_Ep-BL13  gggggaaacgattatccattcagtgggtaatcgatcctgagattgagaactcttaaccct
FbMV1_Ep-N28   -ggggaaacgattatccattcagtgggtaatcgatcctgagattgagaactcttaaccct
FbMV1_Ep-BL14  -ggggaaacgattgtccatttcgtggataatcgatcctgagattgagaactcttaaccct
                *****.*****. ****.*****
                *****

FbMV1_Ep-BL13  tatctcgggtggattttatcttaaactcatcccaactgagggagaagtctggataactcac
FbMV1_Ep-N28   tatctcgggtggattttatcttaaactcatcccaactgagggagaagtctggataactcac
FbMV1_Ep-BL14  tatctcgggtggattttatcttaaactcatcccaactgagggagaagtctggataactcac
                *****
                *****

FbMV1_Ep-BL13  caaccaaagatccgaaaaactaggtccaag-tttaattacttgaattaccagttcttacg
FbMV1_Ep-N28   caaccaaagatccgaaaaactaggtccaagttttaattacttgaattaccagttcttacg
FbMV1_Ep-BL14  caaccaaagatccgaaaaactaggtccaag-tttaattacttgaattaccagttcttacg
                *****
                *****

FbMV1_Ep-BL13  ctagcaccaccgcggATGAACCAGGATGGGGATCGGATCCCAAGCCTGCCCATATTACGG
FbMV1_Ep-N28   ctagcaccaccgcggATGAACCAGGATGGGGATCGGATCCCAAGCCTGCCCATATTACGG
FbMV1_Ep-BL14  ctagcaccaccgcggATGAACCAGGATGGGGATCGGATCCCAAGCCTGCCCATATTACGG
                *****
                *****

FbMV1_Ep-BL13  ACTTTAGTGCTATGTTGTTTAATCACCTTAATTATGAAATCTACTTCATTAACCTCTTTTG
FbMV1_Ep-N28   ACTTTAGTGCTATGTTGTTTAATCACCTTAATTATGAAATCTACTTCATTAACCTCTTTTG
FbMV1_Ep-BL14  ACTTTAGTGCTATGTTGTTTAATCACCTTAATTATGAAATCTACTTCATTAACCTCTTTTG
                *****
                *****

FbMV1_Ep-BL13  AATTCAATCAAATTGTTAAAGAGTAGATCCGTAAGAAAGATGAAGATGTTTCCTTTGAGT
FbMV1_Ep-N28   AATTCAATCAAATTGTTAAAGAGTAGATCCGTAAGAAAGATGAAGATGTTTCCTTTGAGT
FbMV1_Ep-BL14  AATTCAATCAAATTGTTAAAGAGTAGATCCGTAAGAAAGATGAAGATGTTTCCTTTGAGT
                *****
                *****

FbMV1_Ep-BL13  AGTTTAACTACTTCTCTTCTTCCTACTTTAGCTGAGGTTAATACCTTAGCTCTAGGTAGA
FbMV1_Ep-N28   AGTTTAACTACTTCTCTTCTTCCTACTTTAGCTGAGGTTAATACCTTAGCTCTAGGTAGA
FbMV1_Ep-BL14  AGTTTAACTACTTCTCTTCTTCCTACTTTAGCTGAGGTTAATACCTTAGCCCTAGGTAGA
                *****.*****

```

|               |                                                                 |
|---------------|-----------------------------------------------------------------|
| FbMV1_Ep-BL13 | GTGAAGAGAGTTAAAGATAGAATCCGTGTGTCTCACAATTTTTTAGTTTACCTTACTAAG    |
| FbMV1_Ep-N28  | GTGAAGAGAGTTAAAGATAGAATCCGTGTGTCTCACAATTTTTTAGTTTACCTTACTAAG    |
| FbMV1_Ep-BL14 | GTGAAGAGAGTTAAAGATAGAATCCGTGTGTCTCACAATTTTTTAGTTTACCTTACTAGG    |
|               | *****.*                                                         |
| FbMV1_Ep-BL13 | ATGTATCACAATCATGGGAGTGAATTTACCATTAAATGGTTAAAATCTTCTCATGTGCGG    |
| FbMV1_Ep-N28  | ATGTATCACAATCATGGGAGTGAATTTACCATTAAATGGTTAAAATCTTCTCATGTGCGG    |
| FbMV1_Ep-BL14 | ATGTATCACAATCATGGGAGTGAATTTACCATTAAATGGTTAAAATCTTCTCATGTGCGG    |
|               | *****.***                                                       |
| FbMV1_Ep-BL13 | TTACAAAAATTCCTAGGAGGTGATAAACTAAAAAGTTTGAGAGATCTCGAACCGAACTGT    |
| FbMV1_Ep-N28  | TTACAAAAATTCCTAGGAGGTGATAAACTAAAAAGTTTGAGAGATCTCGAACCGAACTGT    |
| FbMV1_Ep-BL14 | TTACAAAAATACCTAGGAGGTGACAACTAAAAAGTTTGAGAGATCTCGAACCGAACTGT     |
|               | ***** *.*****.******                                            |
| FbMV1_Ep-BL13 | CCACTCCCTCGTCTGATTAACGGTTGCTCTGCTTATATTAATAAGAGGGACCGTTCTCTG    |
| FbMV1_Ep-N28  | CCGCTCCCTCGTCTGATCAACGGTTGCTCTGCTTATATTAATAAGAGGGACCGTTCTCTG    |
| FbMV1_Ep-BL14 | CCGCTCCCTCGTCTGATCAACGGTTGCTCTGCTTATATTAATAAGAGGGACCGTTCTCTG    |
|               | **.******.******                                                |
| FbMV1_Ep-BL13 | ATGAGAGAGGGTAATTCCTTTGTGAGCAGATATTGATTGACTCAATTTGGTATTTATCGA    |
| FbMV1_Ep-N28  | ATGAGAGAGGGTAATTCCTTCGTGAGCAGATATTGATTGACTCAATTTGGTATTTATCGA    |
| FbMV1_Ep-BL14 | ATGAGAGAGGGTAATTCCTTCGTGAGTAGATACTGATTGACTCAATTTGGTATTTATCGA    |
|               | *****.******.******                                             |
| FbMV1_Ep-BL13 | GTCCTTTTAGGACCTTTTAAACCCAAATTATCAACCATTACTGACTCATATAAGGGTTCA    |
| FbMV1_Ep-N28  | GTCCTTTTAGGACCTTTTAAACCCAAATTGTCAACCATTACTGACTCATATAAGGGTTCA    |
| FbMV1_Ep-BL14 | GTCCTTTTAGGACCTTTTAAACCCAAATTATCAACCATTACCGACTCATATAAGGGTTCA    |
|               | *****.******.******                                             |
| FbMV1_Ep-BL13 | GTTTCGAGCATCTCTTGAAC TAATTCCTTTGGCTTTTAATCCTTTCATTAAC TTTTACGAT |
| FbMV1_Ep-N28  | GTTTCGAGCATCTCTTGAAC TAATTCCTTTGGCCTTTAATCCTTTCATTAAC TTTTACGAT |
| FbMV1_Ep-BL14 | GTTTCGAGCATCTCTTGAAC TAATTCCTTTGGCCTTTAATCCTTTCATTAAC TTTTACGAT |
|               | *****.******                                                    |
| FbMV1_Ep-BL13 | AAGATAGATTTTAGAGCCCCTACTACTCTGTTTTTGAGTCATAAGGGTTCTCCATCTAAT    |
| FbMV1_Ep-N28  | AAGATAGATTTTAGAGCCCCTACTACTCTATTTTTGAGTCATAAGGGTTCTCCATCTAAT    |
| FbMV1_Ep-BL14 | AAGATAGATTTTAGAGCCCCTACTACTCTGTTTTTGAGTCATAAGGGTTCACCATCTAAT    |
|               | *****.****** *****                                              |

|               |                                                                                        |
|---------------|----------------------------------------------------------------------------------------|
| FbMV1_Ep-BL13 | TCTTTATCGTACAAAGGTATTTTAACAGACTTTTGTCTCTTGAAGTATTCTAGTGTTAGA                           |
| FbMV1_Ep-N28  | TCCTTATCGTACAAAGGTATTTTAACAGACTTTTGTCTCTTGAAGTATTCTAGTGTTAGA                           |
| FbMV1_Ep-BL14 | TCCTTATCGTACAAAGGTATTTTAACAGACTTTTGTCTCTTGAAGTATTCTAGTGTTAGA<br>** .*****              |
| FbMV1_Ep-BL13 | TTGTCTGAGATCGATTTTTCTCGACCTAAGCATTCTCCCATCTATGATAACTTATTAAAA                           |
| FbMV1_Ep-N28  | TTGTCTAAGATCGATTTTTCTCGACCTAAGCATTCTCCCATCTATGATAACTTATTAAAA                           |
| FbMV1_Ep-BL14 | TTGTCTAAGATCGATTTTTCTCGACCTAAGCATTCTCCCATCTATGATAACTTATTAAAA<br>***** .*****           |
| FbMV1_Ep-BL13 | TATCTTGATTTGTTAGAGGTTGAAGGTCGTTTGCCCTTGAGAAGATTGAGATCAGTTCTA                           |
| FbMV1_Ep-N28  | TATCTTGATTTGTTAGAGGTTGAAGGTCGTTTGCCCTTGAGAAGATTGAGATCAGTTCTA                           |
| FbMV1_Ep-BL14 | TATCTTGATTTGTTAGAGGTTGAAGGTCGTTTGCCCTTGAGAAGATTGAGATCAGTTCTG<br>***** .                |
| FbMV1_Ep-BL13 | TCTTCACTTGACACTCTAGCTTCTTCGTTGAAGTCAGAGGGTCTTAGTTTAAATACAAAA                           |
| FbMV1_Ep-N28  | TCTTCACTTGACACTCTAGCTTCTTCATTGAAGTCAGAGGGTCTTAGTTTAAATACAAAA                           |
| FbMV1_Ep-BL14 | TCCTCACTTGACACTCTAGCTTCTTCGTTGAAGTCGAGGGTCTTAGTTTAAATACAAAA<br>** .***** .***** .***** |
| FbMV1_Ep-BL13 | GTGAGTATAAGAAATGGTCTGTCTCAGTTCGCCGTAAAGAGGAGGCTGCTGGAAAATTA                            |
| FbMV1_Ep-N28  | GTGAGTATAAGAAATGGTCTGTCTCAGTTCGCTGTAAAGAGGAGGCTGCTGGAAAATTA                            |
| FbMV1_Ep-BL14 | GTGAGCATGAGAAATGGTCTGTCTCAGTTCGCCGTAAAGAGGAGGCTGCTGGAAAATTA<br>***** .** .***** .***** |
| FbMV1_Ep-BL13 | AGAGTTTTTGCTCTTTTAGATTCCATAAGTCAGTCTGCTCTTAAACCGCTTCATGAGTTT                           |
| FbMV1_Ep-N28  | AGAGTTTTTGCTCTTTTAGATTCCATAAGTCAGTCTGCTCTTAAACCGCTTCATGAGTTT                           |
| FbMV1_Ep-BL14 | AGAGTTTTTGCTCTTTTAGATTCCATAAGTCAGTCTGCTCTGAAACCGCTTCATGAGTTT<br>***** *****            |
| FbMV1_Ep-BL13 | TTATTTGACGTCCTGCGTCGTTACCTAATGATGGTACATTGACCAGGATGCCTCAGTT                             |
| FbMV1_Ep-N28  | TTATTTGATGTCCTGCGTCGTTACCTAATGATGGTACATTGACCAGGATGCCTCAGTT                             |
| FbMV1_Ep-BL14 | TTATTTGATATCCTGCGTCGTTACCTAATGATGGTACATTGACCAGGATGCCTCAGTT<br>***** .                  |
| FbMV1_Ep-BL13 | AAGAGGTCAAATGAAAAATTTTCTCAGYTTGGTATCGCATATTCTTTTGACCTATCTGCT                           |
| FbMV1_Ep-N28  | AAGAGATCAAATGAAAAATTTTCTCAATTTGGTATCGCATATTCTTTTGACCTATCTGCT                           |
| FbMV1_Ep-BL14 | AAGAGATCAAATGAAAAATTTTCTCAATTTGGTATCGCATATTCTTTTGACCTATCTGCT<br>***** *****            |

|               |                                                               |
|---------------|---------------------------------------------------------------|
| FbMV1_Ep-BL13 | GCTACTGATAGATTACCTGTAGATCTTACAGGTTCTATATTAGAGCAAATGGTAGGTATT  |
| FbMV1_Ep-N28  | GCTACTGATAGATTACCTGTAGATCTTACAGGTTCTATATTAGAGCAAATGGTAGGTATT  |
| FbMV1_Ep-BL14 | GCTACTGATAGATTACCTGTAGATCTTACAGGTTCTATATTAGAGCAACTGGTAGGTATT  |
|               | *****                                                         |
| FbMV1_Ep-BL13 | AAGGGTTTCTCTTCTTCTTGAAGTCGATTATGGTTGACCGGGATTTTCAATTCCCAGAA   |
| FbMV1_Ep-N28  | AAGGGTTTCTCTTCTTCTTGAAGTCGATTATGGTTGACCGGGATTTTCAATTCCCAGAA   |
| FbMV1_Ep-BL14 | AAGGGTTTCTCTTCTTCTTGAAGTCGATTATGGTTGACCGGGATTTTCAATTCCCAGAA   |
|               | *****                                                         |
| FbMV1_Ep-BL13 | GCCGTCGTCGATAAATATTTCAAGGGAGAGGACCCCGGATATATCCGATACTCCGTAGGG  |
| FbMV1_Ep-N28  | GCCGTTGTCGATAAATATTTCAAGGGAGAGGACCCCGGATATATTCGATACTCCGTAGGG  |
| FbMV1_Ep-BL14 | GCCGTTGTCGATAAATATTTCAAGGGAGAGGACCCCGGATATATTCGATACTCCGTAGGG  |
|               | *****.*****.*****                                             |
| FbMV1_Ep-BL13 | CAACCAATGGGTGGTCTTAGTTCTTGAGCAGGACTTGCTATCACTCATCACTGAATTCTC  |
| FbMV1_Ep-N28  | CAACCAATGGGTGGTCTTAGTTCTTGAGCAGGACTTGCTATCACTCATCACTGAATTCTC  |
| FbMV1_Ep-BL14 | CAACCAATGGGTGGTCTTAGTTCTTGAGCAGGACTTGCTATCACTCATCACTGAATTCTC  |
|               | *****                                                         |
| FbMV1_Ep-BL13 | CAACTATGTTTCATCTCGTCTTAATAATTTAGGAtgaGAGACTCGTTATGAGATTCTCGGT |
| FbMV1_Ep-N28  | CAACTATGTTTCATCTCGTCTTAATAATTTAGGATGAGAGACTCGTTATGAGATTCTCGGT |
| FbMV1_Ep-BL14 | CAACTATGTTCTTCTCGTCTTAATAATTTAGGATGAGAGACTCGTTATGAGATTCTCGGT  |
|               | *****                                                         |
| FbMV1_Ep-BL13 | GATGATATAGTTATCTTTGACTCAAAGTTAGCGAAGATGTACCTTTATGTTATGCAAGAG  |
| FbMV1_Ep-N28  | GATGATATAGTTATCTTTGACTCAAAGTTAGCGAAGATGTACCTTTACGTTATGCAAGAG  |
| FbMV1_Ep-BL14 | GATGATATAGTTATCTTTGACTCAAAGTTAGCGAAGATGTACCTTTATGTTATGCAAGAG  |
|               | *****.*****                                                   |
| FbMV1_Ep-BL13 | TTGGGTCTCGAGGTTAATTCCTCGAAATCAATTAATGCTTCTCATTYAGGTTTCAATTC   |
| FbMV1_Ep-N28  | TTGGGTCTCGAGGTTAATTCCTCGAAATCAATTAATGCATCTCATTACAGGTTTCAATTC  |
| FbMV1_Ep-BL14 | TTGGGTCTCGAGGTTAATTCCTCGAAATCAATTAATGCTTCTCATTACAGGTTTCAATTC  |
|               | *****                                                         |
| FbMV1_Ep-BL13 | GCGAAACGAACTATGATCAATGGGGTAGACGTTTCTGCCCTTTCTCTTCAGCAGATGTTG  |
| FbMV1_Ep-N28  | GCGAAACGAACTATGATCAATGGGGTAGACGTTTCTGCCCTTTCTCTTCAGCAGATGTTG  |
| FbMV1_Ep-BL14 | GCGAAACGAACTATGATCAATGGGGTAGACGTTTCTGCCCTTTCTCTTCAGCAGATGTTG  |
|               | *****                                                         |

|               |                                                                |
|---------------|----------------------------------------------------------------|
| FbMV1_Ep-BL13 | AGTTCAACTTCTTTAGGTTCTAAAGTTATTGACACTTTTCGTCTATTGTGCGAAAAGGGTTA |
| FbMV1_Ep-N28  | AGTTCAACTTCTTTAGGTTCTAAAGTTATTGATACTTTTCGTCTATTGTGCGAAAAGGGTTA |
| FbMV1_Ep-BL14 | AGTTCAACTTCTTTAGGTTCTAAAGTTATTGACACTTTTCGTCTATTGTGCGAAAAGGGTTA |
|               | *****.*****                                                    |
| FbMV1_Ep-BL13 | GTTTCCTCTATATCTCATTTTTCCCGTCTTCTGACTGGTATCCCTGATAACTCAGTTTTT   |
| FbMV1_Ep-N28  | GTTTCCTCTATATCTCATTTTTCCCGTCTTCTGACTGGTATCCCTGATAACTCAGTTTTT   |
| FbMV1_Ep-BL14 | GTTTCCTCTATATCTCATTTTTCCCGTCTTCTGACTGGTATCCCTGATAACTCAGTTTTT   |
|               | *****                                                          |
| FbMV1_Ep-BL13 | AGAAGAATTTCTAAAAC TGGGTACCAGCGTTATCCTTTCTTAATGTACTGTGATCAGCT   |
| FbMV1_Ep-N28  | AGAAGAATTTCTAAAAC TGGGTACCAGCGTTATCCTTTCTTAATGTACTGTGATCAGCT   |
| FbMV1_Ep-BL14 | AGAAGAATTTCTAAAAC TGGGTACCAGCGTTATCCTTTCTTAATGTACTGTGATCAGCT   |
|               | *****                                                          |
| FbMV1_Ep-BL13 | GATCTGGTACAGTTGAGAATTGTTTTAGAGGCAGTAGTCAATCCTAAATATGAGGATTTT   |
| FbMV1_Ep-N28  | GATCTGGTACAGTTGAGAATTGTTTTAGAGGCAGTAGTCAATCCTAAATATGAGGATTTT   |
| FbMV1_Ep-BL14 | GATCTGGTACAGTTGAGAATTGTTTTAGAGGCAGTAGTCAATCCTAAATATGAGGATTTT   |
|               | *****                                                          |
| FbMV1_Ep-BL13 | GACTTCgATAGGTCGAAATTCGACCTACCACTGGTCTCTTTACTAGGATATATGCTGGAC   |
| FbMV1_Ep-N28  | GACTTCGATAGGTCGAAATTCGACTTACCACTGGTCTCTTTACTAGGATATATGCTGGAC   |
| FbMV1_Ep-BL14 | GACTTCGATAGGTCGAAATTCGACCTACCACTGGTCTCTTTACTAGGATATATGCTGGAC   |
|               | *****.*****                                                    |
| FbMV1_Ep-BL13 | ATTGCAAATGGTTCAGTCGATAAGACTTACCCATTTTCAATGGAATCCGATAGGCGTGAC   |
| FbMV1_Ep-N28  | ATTGCAAATGGTTCGGTCGATAAGACTTACCCATTTTCAATGGAATCCGATAGGCGTGAC   |
| FbMV1_Ep-BL14 | ATTGCAAATGGTTCAGTCGATAAGACTTACCCATTTTCAATGGAATCCGACAGGCGTGAC   |
|               | *****.*****.*****                                              |
| FbMV1_Ep-BL13 | TTTTCAAGAGATTATGAGCCGCATTTAGCAGCTGTAATCCTTCAGGAATCGTTATCTAAG   |
| FbMV1_Ep-N28  | TTTTCAAGAGATTATGAGCCGCATTTAGCAGCTGTAATCCTTCAGGAATCGTTATCTAAG   |
| FbMV1_Ep-BL14 | TTTTCAAGAGATTATGAGCCGCATTTGGCAGCTGTAATCCTTCAGGAATCGTTATCTAAG   |
|               | *****.*****                                                    |
| FbMV1_Ep-BL13 | ATAAAAAC TTTATCGAGAGATTACGATCACCTGATTAAGACTGGAGCTTTAGCTTTATTC  |
| FbMV1_Ep-N28  | ATAAAAAC TTTATCGAGAGATTACGATCACCTGATTAAGACTGGAGCTTTAGCTTTATTT  |
| FbMV1_Ep-BL14 | ATAAAAAC TTTATCGAGAGATTACGATCACCTGATTAAGACTGGAGCTTTAGCTTTATTC  |
|               | *****.                                                         |

|               |                                                                |
|---------------|----------------------------------------------------------------|
| FbMV1_Ep-BL13 | AAAGGTAAAGCTTCACCCTTATTGAATAGTCAGTTTGAAGGTTTCTTTTCCGATATCATT   |
| FbMV1_Ep-N28  | AAAGGTAAAGCTTCAGCCTTATTGAATAGTCAGTTTGAAGGTTTCTTTTCCGATATCATT   |
| FbMV1_Ep-BL14 | AAAGGTAAAGCTTCAGCCTTATTGAATAGTCAGTTTGAAGGTTTCTTTTCCGATATCATT   |
|               | *****                                                          |
| FbMV1_Ep-BL13 | ATAGATTTAACAAAATTAGATCCATATGATAAGGTTGACGAGATAGAATCTATTCTATAC   |
| FbMV1_Ep-N28  | ATAGATTTAACAAAATTAGATCCATATGATAAGGTTGACGAGATAGAATCTATTCTATAT   |
| FbMV1_Ep-BL14 | ATAGATTTAACAAAATTAGATCCATATGATAAGGTTGACGAGATAGAATCTATTCTATAC   |
|               | *****                                                          |
| FbMV1_Ep-BL13 | CGTCATGCTAAGACTCCTTCATGCTCTGTCTCGACAGGCTTTAACAAATTTTGGAGGAAGTG |
| FbMV1_Ep-N28  | CGTCATGCTAAGACTCCTTCATGCTCTGTCTCGACAGGCTTTAACAAATTTTGGAGGAAGTG |
| FbMV1_Ep-BL14 | CGTCATGCTAAGACTCCTTCATGCTCTGTCTCGACAGGCTTTAACAAATTTTGGAGGAGGTG |
|               | *****                                                          |
| FbMV1_Ep-BL13 | AATTCTCTTGTCTTTAAATTTACATTTAAGACAGAGATTTCTCGTGTAATAACGAGAAG    |
| FbMV1_Ep-N28  | AATTCTCTTGTCTTTAAATTTACATTTAAGACAGAGATTTCTCGTGTAATAACGAGAAG    |
| FbMV1_Ep-BL14 | AATTCTCTTGTCTTTAAATTTACATTTAAACAGAGATTTCTCGTGTAATAACGAGAAG     |
|               | *****                                                          |
| FbMV1_Ep-BL13 | GATTCATCTCCTATCCTTCAATTGTTAAGAAAGTCAGAAGGGCGCATTCCCATTAACTAT   |
| FbMV1_Ep-N28  | GATTCATCTCCTATCCTTCAATTGTTAAGAAAGTCAGAAGGGCGCATTCCCATTAACTAT   |
| FbMV1_Ep-BL14 | GATTCATCTCCTATCCTTCAATTGTTAAGAAAGTCAGAAGGGCGCATTCCCATTAACTAT   |
|               | *****                                                          |
| FbMV1_Ep-BL13 | TGACAGACACCGGTTCTATCTTACTAACcaagggttattggtcttcagattgctttctaca  |
| FbMV1_Ep-N28  | TGACAGACACCGGTTCTATCTTACTAACcaagggttattggtcttcagattgctttctgca  |
| FbMV1_Ep-BL14 | TGACAGACACCGGTTCTATCTTACTAACcaagggttattggtcttcagattgctttctaca  |
|               | *****                                                          |
| FbMV1_Ep-BL13 | tcaatttattgatgagacgggtatctgctcaaaaggggtctcgaagataggattaatcatcc |
| FbMV1_Ep-N28  | tcaatttattgatgagacgggtatctgctcaaaaggggtctcgaagataggattaatcatcc |
| FbMV1_Ep-BL14 | tcaacttggtgatgagacgggtatctgctcaaaaggggtctcgaagataggattaatcatcc |
|               | ****.***                                                       |
| FbMV1_Ep-BL13 | tggcagcgaggggttccttcgttttcattaacgagaatgcccc                    |
| FbMV1_Ep-N28  | tggcagcgaggggttccttcgttttcattaacgagaatgcccc                    |
| FbMV1_Ep-BL14 | tggcagcgaggggttccttcgttttcattaacgagaatgcccc                    |
|               | *****                                                          |
