# Supplementary material for: Novel Mitoviruses and a Unique Tymo-Like Virus in Hypovirulent and Virulent Strains of the Fusarium Head Blight Fungus, Fusarium boothii
Source: MDPI journal article supplement (doi:10.3390/v10110584), 2018-10-26
Supplement: s1 [file s1]

CLUSTAL format alignment by MAFFT (v7.390)

|              |                                                                |
|--------------|----------------------------------------------------------------|
| AROM_domain  | NFPDEEFKTLRELYD---IALKNG--VEFLDL---ELTLPTDIQY-EVINKRGNTKIIGS   |
| FbMV1_AROM   | SYKGSV-RASTETIP----LAFNPFINFYD--KMDFRAPTTTFLSHKGSPSNLSYKGI     |
| TcMV_AROM    | KFTGDR-DGLRALMR---FALKFNPFVEFNKL-DKKS LAPTKFIMSRASPSNKVSWFGI   |
| BcMV3_AROM   | PFKGS I-NEFNDI IQGPVFSIFFDRLNGFPELVKKS NLAPSKVRLLRSSSSSNVSWHGI |
| FpMV3_AROM   | PYKGSV-DYLNKCLE---ISLNTKWQASIQKICQNHNLAPTTFHMSGKASPSNVNSSTGI   |
| Sl aMV5_AROM | PFSGSE-LFLNDLIS---LSL KTPWPKN LLEIASKHNLAPTSFHFSGKASPSNVNSSQGL |
|              | : . . : : . * : . . . *                                        |

|              |                                                         |
|--------------|---------------------------------------------------------|
| AROM_domain  | HHDFQGL-----YSWDDAEWENRFNQALTLDVDVVKFVGTA VNFEDNL--RL   |
| FbMV1_AROM   | LTDFCTLKYSSVRLSEIDFSRPKHSPIDNLLKYTDLLEV-EGRLP-----L-RRF |
| TcMV_AROM    | LTDRLL-----REGSPRLWENIQAYLTMVGADQFRFD--LDYACSLADRL      |
| BcMV3_AROM   | ITDSWNI-----SNSKEMSSNVS NYLAS IKA-----LGWNT             |
| FpMV3_AROM   | LSDIYYL-----LAHPDGAFVFSN ILKHLEIVGS-----V-WNT           |
| Sl aMV5_AROM | LSDIYYL-----LSHPEGDIVVYNLLNYLDNIGV-----V-WNT            |
|              | * : * : :                                               |

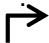

|              |                                                                 |
|--------------|-----------------------------------------------------------------|
| AROM_domain  | EHFRDTHKNKPLIAVNMTSKGSI SRVLNNVLT PVTSDL LPNSAAPGQLTVAQINKMYTSM |
| FbMV1_AROM   | RSVTSSTD-----TTASSLK--SEGTSLNTKVS MRNG-----TSQFAVKEEAA          |
| TcMV_AROM    | KSFDDKVDSSQGQW---IRQVSKSGQVL TQVDSMKSKDSIRGHGIGPGLGLSQFALKEEAA  |
| BcMV3_AROM   | MWFNSKLN-----EMIELGDRLNQVGSLKTKKSLSGQ-----FGQFSLKEEAA           |
| FpMV3_AROM   | QSFLQRLN-----DGAEIVKRM--SSIQTKCSMRNP-----FGQFAIKEEAA            |
| Sl aMV5_AROM | KMFLSRLN-----DAKDIILRLPE-GSLPFKKS MVTP-----FGQFAIKKEAA          |
|              | . . . : . : . *: :                                              |

|              |                                                              |
|--------------|--------------------------------------------------------------|
| AROM_domain  | GGIEPKELFVVGKPIGHSRSPILHNTGYEIL-GLPHK--FDKFETESAQLVKEKLLDGNK |
| FbMV1_AROM   | GKL---RVFATLDSMSQSATKPTHEFLFDVTRRLPNDGTFD--QDASVKRSNEKFSQXGI |
| TcMV_AROM    | GKI---RLFALMDSITQSVMSPLHDYMFAILRNIPNDGTFD--QEASIARSQEKAVTAGK |
| BcMV3_AROM   | GKL---RIFAIVDSITQSLLSPLHDFMFDLLKKIPNDGTFD--QDLSVKRSQVKSLSGGK |
| FpMV3_AROM   | GKV---RVFALVDSITQSVMKPIHLGLFKVLRHLPNDGTFD--QDASVTRCSEKASEAGK |
| Sl aMV5_AROM | GKI---RVFALVDSITQSVMKPLHLGLFAVLKQLPNDGTFD--QDASVTRCSIKAQQAGK |
|              | * : . : * . . : * * : : : * : * * : * .                      |

|              |                                                    |
|--------------|----------------------------------------------------|
| AROM_domain  | NFG---GAAVTIPLKL--DIMQYMDELTDAAKVIGAVNTVIP LGNKKF  |
| FbMV1_AROM   | AYSFD TSAATDRLPVDTTGSMLEQMVGIKGFSSSWKSI----MVD RDF |
| TcMV_AROM    | AFSYDLTAATDRLPVILTAFILSTIVGIRTFGGLWRSI----LVKRPF   |
| BcMV3_AROM   | AFSFDLSAATDRLPVDLTVKILSKIFS-DEFGTSWKQL----MVNRDF   |
| FpMV3_AROM   | AFSFDLSAATDRLPVSLTGNIIESLFKIPGLSQSWQKV----MVD RNF  |
| Sl aMV5_AROM | AFSFDLSAATDRLPVGLTGSIIESLFQITDLSNSWKS V----MVD REE |
|              | : . . * : * : : : : : : : * :                      |
